# Supplementary material
Source: publisher site journal article supplement (https://www.dovepress.com/article/437899)
Supplement: Supplementary file 1 [file get_supplementary_file.php]

## Supplementary Table 1 Detailed search queries per database

### Original search (28-Sept-2021) - no restrictions

#### PubMed:

("Pulmonary Disease, Chronic Obstructive"[Mesh] OR copd[Title/Abstract] OR "chronic obstructive pulmonary disease"[Title/Abstract]) AND ("Heart Failure"[Mesh] OR "heart failure"[Title/Abstract]) AND (predict\*[Title/Abstract] OR "Prognosis"[Mesh] OR prognos\*[Title/Abstract] OR "Biomarkers"[Mesh] OR biomarker\*[Title/Abstract] OR marker\*[Title/Abstract])  
2,035 results

#### Scopus (Elsevier):

(TITLE-ABS-KEY (copd OR "chronic obstructive pulmonary disease") AND TITLE-ABS-KEY("heart failure") AND TITLE-ABS-KEY(predict\* OR prognos\* OR biomarker\* OR marker\*))  
2,157 results

#### Web of Science (Clarivate):

(TS=(copd) OR TS=("chronic obstructive pulmonary disease")) AND TS=("heart failure") AND (TS=(predict\*) OR TS=(prognos\*) OR TS=(biomarker\*) OR TS=(marker\*))  
1,809 results

#### Cochrane Library:

#1 MeSH descriptor: [Pulmonary Disease, Chronic Obstructive] explode all trees  
#2 MeSH descriptor: [Heart Failure] explode all trees  
#3 MeSH descriptor: [Prognosis] explode all trees  
#4 MeSH descriptor: [Biomarkers] explode all trees  
#5 (copd OR "chronic obstructive pulmonary disease"):ti,ab,kw  
#6 ("heart failure"):ti,ab,kw  
#7 (predict\* OR prognos\* OR biomarker\* OR marker\*):ti,ab,kw  
#8 (#1 OR #5) AND (#2 OR #6) AND (#3 OR #4 OR #7)  
273 results

#### Embase (Elsevier):

(copd:ti,ab,kw OR 'chronic obstructive lung disease':ti,ab,kw) AND 'heart failure':ti,ab,kw AND (predict\*:ti,ab,kw OR prognos\*:ti,ab,kw OR biomarker\*:ti,ab,kw OR 'biological marker':ti,ab,kw OR marker\*:ti,ab,kw)  
2,143 results

#### CINAHL (EBSCOhost):

TI("chronic obstructive pulmonary disease" OR copd OR "chronic obstructive airway disease" OR "chronic obstructive lung disease") AND TI("heart failure" OR "cardiac failure" OR chf OR "chronic heart failure" OR "congestive heart failure") AND AB(predict\* OR prognos\* OR biomarker\* OR marker\*)  
39 results

---

TOTAL: 8,456 results

Deduplication method (29-9-2021):

After deduplication in EndNote X9.3.3: 5,389 (3,067 duplicates removed)

After deduplication in Covidence: 4,695 (694 duplicates removed)  
Number of records for title-abstract screening in ASReview: 4,695

## Search Update (24-Apr-2023) - restrictions: Year 2021-2023

### PubMed:

("Pulmonary Disease, Chronic Obstructive"[Mesh] OR copd[Title/Abstract] OR "chronic obstructive pulmonary disease"[Title/Abstract]) AND ("Heart Failure"[Mesh] OR "heart failure"[Title/Abstract]) AND (predict\*[Title/Abstract] OR "Prognosis"[Mesh] OR prognos\*[Title/Abstract] OR "Biomarkers"[Mesh] OR biomarker\*[Title/Abstract] OR marker\*[Title/Abstract])  
469 results

### Scopus (Elsevier):

( TITLE-ABS-KEY ( copd OR "chronic obstructive pulmonary disease" ) AND TITLE-ABS-KEY ( "heart failure" ) AND TITLE-ABS-KEY ( predict\* OR prognos\* OR biomarker\* OR marker\* ) ) AND ( LIMIT-TO ( PUBYEAR , 2024 ) OR LIMIT-TO ( PUBYEAR , 2023 ) OR LIMIT-TO ( PUBYEAR , 2022 ) OR LIMIT-TO ( PUBYEAR , 2021 ) )  
532 results

### Web of Science (Clarivate):

(TS=(copd) OR TS=("chronic obstructive pulmonary disease")) AND TS=("heart failure") AND (TS=(predict\*) OR TS=(prognos\*) OR TS=(biomarker\*) OR TS=(marker\*))  
432 results

### Cochrane Library:

#1 MeSH descriptor: [Pulmonary Disease, Chronic Obstructive] explode all trees  
#2 MeSH descriptor: [Heart Failure] explode all trees  
#3 MeSH descriptor: [Prognosis] explode all trees  
#4 MeSH descriptor: [Biomarkers] explode all trees  
#5 (copd OR "chronic obstructive pulmonary disease"):ti,ab,kw  
#6 ("heart failure"):ti,ab,kw  
#7 (predict\* OR prognos\* OR biomarker\* OR marker\*):ti,ab,kw  
#8 (#1 OR #5) AND (#2 OR #6) AND (#3 OR #4 OR #7)  
59 results

### Embase (Elsevier):

(copd:ti,ab,kw OR 'chronic obstructive lung disease':ti,ab,kw) AND 'heart failure':ti,ab,kw AND (predict\*:ti,ab,kw OR prognos\*:ti,ab,kw OR biomarker\*:ti,ab,kw OR 'biological marker':ti,ab,kw OR marker\*:ti,ab,kw)  
415 results

### CINAHL (EBSCOhost):

TI("chronic obstructive pulmonary disease" OR copd OR "chronic obstructive airway disease" OR "chronic obstructive lung disease") AND TI("heart failure" OR "cardiac failure" OR chf OR "chronic heart failure" OR "congestive heart failure") AND AB(predict\* OR prognos\* OR biomarker\* OR marker\*)  
3 results

---

TOTAL: 1,910 results

Deduplication method (28-4-2023):

After deduplication in EndNote X9.3.3: 1,226 (684 duplicates removed)

After deduplication in Covidence: 691 (535 duplicates removed)

Number of records for title-abstract screening in ASReview: 691

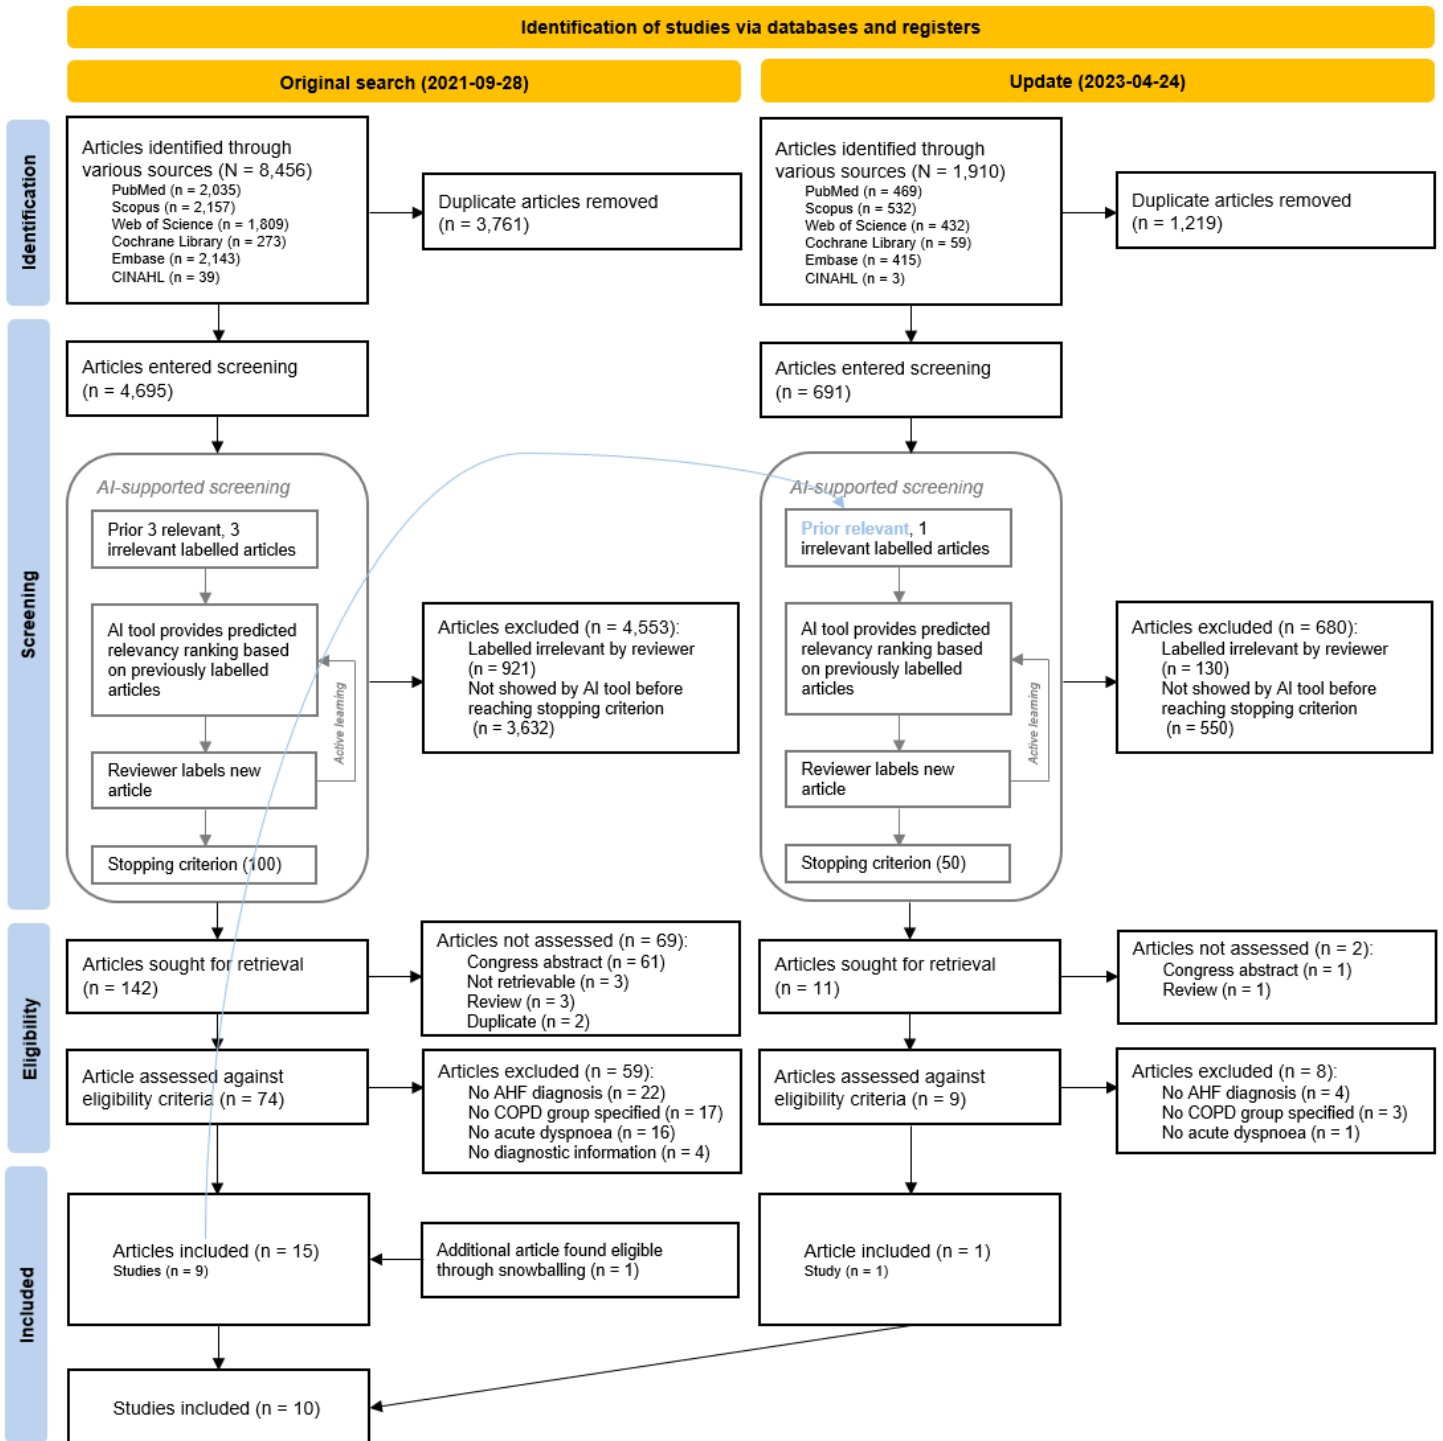

**Supplementary Figure 1** Detailed overview of AI-supported article selection

**Supplementary Table 2** Detailed quality assessment (QUADAS-2) table

| <b>Bibliographic information</b>                                                                                                              | <b>Patient_selection (PS)</b> |              |              |             |              | <b>Index_test (IT)</b> |              |             |              | <b>Reference_standard (RS)</b> |              |             |              | <b>Flow_and_Timing (FT)</b> |              |               |               |             |
|-----------------------------------------------------------------------------------------------------------------------------------------------|-------------------------------|--------------|--------------|-------------|--------------|------------------------|--------------|-------------|--------------|--------------------------------|--------------|-------------|--------------|-----------------------------|--------------|---------------|---------------|-------------|
| <b>Author, publication year</b>                                                                                                               | <b>A1_PS</b>                  | <b>A2_PS</b> | <b>A3_PS</b> | <b>A_PS</b> | <b>B_PS</b>  | <b>A4_IT</b>           | <b>A5_IT</b> | <b>A_IT</b> | <b>B_IT</b>  | <b>A6_RS</b>                   | <b>A7_RS</b> | <b>A_RS</b> | <b>B_RS</b>  | <b>A8_FT</b>                | <b>A9_FT</b> | <b>A10_FT</b> | <b>A11_FT</b> | <b>A_FT</b> |
| Dieplinger, 2009, <sup>25</sup> Dieplinger, 2010 <sup>26</sup>                                                                                | Yes                           | Yes          | Yes          | Low risk    | Low concern  | Yes                    | No           | Low risk    | Low concern  | Yes                            | Yes          | Low risk    | Low concern  | Unclear                     | Yes          | No            | Yes           | Low risk    |
| Fabbian, 2011 <sup>30</sup>                                                                                                                   | Yes                           | Yes          | Yes          | Unclear     | Low concern  | Unclear                | Yes          | Low risk    | Low concern  | Yes                            | Unclear      | Low risk    | Low concern  | Unclear                     | Yes          | Yes           | Yes           | Unclear     |
| Gálvez-Barrón, 2019 <sup>41</sup>                                                                                                             | Yes                           | Yes          | No           | High risk   | High concern | Unclear                | Yes          | High risk   | High concern | Yes                            | Yes          | Low risk    | Low concern  | No                          | Yes          | Unclear       | Yes           | Unclear     |
| Høiseth, 2016, <sup>42</sup> Winther, 2016, <sup>43</sup> Winther, 2017, <sup>44</sup> Pervez, 2017, <sup>45</sup> Pervez, 2018 <sup>46</sup> | Yes                           | Yes          | Yes          | Low risk    | Low concern  | Unclear                | NA           | Unclear     | Low concern  | Yes                            | Yes          | Low risk    | Low concern  | Yes                         | No           | No            | No            | High risk   |
| Johannessen, 2023 <sup>47</sup>                                                                                                               | No                            | Yes          | Yes          | Low risk    | Low concern  | Yes                    | Yes          | Low risk    | Low concern  | Yes                            | Yes          | Low risk    | Low concern  | No                          | Yes          | Unclear       | Yes           | High risk   |
| McCullough, 2003, <sup>48</sup> Maisel, 2002 <sup>49</sup>                                                                                    | Unclear                       | Yes          | Yes          | Unclear     | High concern | Yes                    | Unclear      | Unclear     | Low concern  | Yes                            | Yes          | Low risk    | Low concern  | Unclear                     | Yes          | No            | Yes           | High risk   |
| Moon, 2005 <sup>28</sup>                                                                                                                      | Unclear                       | Yes          | Yes          | Low risk    | Low concern  | Unclear                | No           | Unclear     | Low concern  | No                             | Unclear      | High risk   | Unclear      | Unclear                     | No           | No            | Yes           | Low risk    |
| Tinë, 2020 <sup>50</sup>                                                                                                                      | Unclear                       | Yes          | Yes          | Unclear     | Low concern  | Yes                    | Unclear      | Unclear     | Unclear      | Yes                            | Yes          | Low risk    | High concern | Unclear                     | No           | No            | Yes           | Low risk    |
| Tung, 2006 <sup>29</sup>                                                                                                                      | Yes                           | Yes          | Yes          | Low risk    | High concern | Yes                    | Yes          | Low risk    | Low concern  | Unclear                        | Yes          | Unclear     | Low concern  | Unclear                     | Yes          | No            | No            | Low risk    |
| Yamanoğlu, 2015 <sup>31</sup>                                                                                                                 | Yes                           | Yes          | No           | High risk   | Low concern  | Unclear                | No           | High risk   | Low concern  | Yes                            | Unclear      | Low risk    | Low concern  | Yes                         | No           | Yes           | No            | High risk   |
